# Supplementary material
Source: PubMed Central journal article supplement (PMC4583332)
Supplement: NIHMS696477-supplement-Supplemental_Table_1__Denvir_et__al_2015_.pdf [file NIHMS696477-supplement-Supplemental_Table_1__Denvir_et__al_2015_.pdf]

**Supplementary Table 1.** SNPs shared by both III-29 and IV-18 resulting in a missense or nonsense amino acid change or occurring at a splice site with minor allele frequency (MAF) less than 5% or unknown. Chromosome positions are based on the hg19 human reference genome build.

| Gene     | dbSNP ID#   | MAF      | Amino Acid Change | Nucleotide change | PolyPhen2 prediction | Chromosome | Position  |
|----------|-------------|----------|-------------------|-------------------|----------------------|------------|-----------|
| AASDH    | rs61978622  | 0.018062 | D → N             | G → A             | benign               | chr4       | 57215969  |
| ABCA8    | rs35621847  | 0.039862 | A → V             | C → T             | benign               | chr17      | 66924083  |
| ABCC8    |             | Unknown  | I → V             | A → G             | benign               | chr11      | 17428614  |
| ABCG8    | rs144200355 | 0.001325 | T → S             | A → T             | possibly damaging    | chr2       | 44099435  |
| ABI3     | rs616338    | 0.003599 | F → S             | T → C             | benign               | chr17      | 47297297  |
| ABO      | rs8176696   | 0.022458 | G → R             | G → A             | possibly damaging    | chr9       | 136136773 |
| ABO      | rs34229678  | Unknown  | R → H             | A → G             | benign               | chr9       | 136135238 |
| ACAN     | rs117116488 | 0.002166 | S → L             | C → T             | probably damaging    | chr15      | 89390513  |
| ACAN     | rs11638262  | Unknown  | A → T             | G → A             | benign               | chr15      | 89399453  |
| ACAN     |             | Unknown  | A → T             | G → A             | benign               | chr15      | 89399510  |
| ACAN     |             | Unknown  | A → T             | G → A             | benign               | chr15      | 89399909  |
| ACOT4    | rs3742819   | 0.001825 | R → C             | C → T             | possibly damaging    | chr14      | 74058832  |
| ACP6     | rs143920833 | 0.003297 | D → G             | A → G             | possibly damaging    | chr1       | 147131553 |
| ACSBG2   | rs79266675  | 0.010834 | D → E             | T → A             | benign               | chr19      | 6141593   |
| ACSF3    | rs11547019  | 0.044738 | A → P             | G → C             | benign               | chr16      | 89167138  |
| ACSM5    | rs12931877  | 0.02458  | H → R             | A → G             | benign               | chr16      | 20441077  |
| ACTN3    | rs71457732  | 0.006843 | R → C             | C → T             | probably damaging    | chr11      | 66330533  |
| ADAMTS10 | rs62621197  | 0.025665 | R → Q             | G → A             | benign               | chr19      | 8670147   |
| ADAT3    | rs139117131 | Unknown  | T → M             | C → T             | possibly damaging    | chr19      | 1912594   |
| AGAP4    |             | Unknown  | R → H             | G → A             | probably damaging    | chr10      | 46321904  |
| AGAP7    | rs4043618   | Unknown  | R → Q             | G → A             | probably damaging    | chr10      | 51465650  |
| AGAP7    | rs61850063  | Unknown  | D → E             | C → G             | benign               | chr10      | 51464656  |
| AGAP7    | rs61850064  | Unknown  | Y → N             | T → A             | benign               | chr10      | 51465552  |
| AGXT     |             | Unknown  | P → L             | C → T             | probably damaging    | chr2       | 241808314 |
| AHNAK    | rs114515655 | 0.008014 | V → M             | G → A             | probably damaging    | chr11      | 62286666  |

|           |             |          |       |       |                   |       |           |
|-----------|-------------|----------|-------|-------|-------------------|-------|-----------|
| AHNAK2    | rs28737397  | Unknown  | S → G | A → G | benign            | chr14 | 105411971 |
| AHNAK2    | rs2013462   | 0.002735 | V → A | T → C | benign            | chr14 | 105416959 |
| AKAP12    | rs61748676  | 0.019596 | S → C | A → T | probably damaging | chr6  | 151672185 |
| AKAP13    | rs79101360  | Unknown  | T → P | A → C | possibly damaging | chr15 | 86287035  |
| AKAP9     |             | Unknown  | A → T | G → A | benign            | chr7  | 91632004  |
| AKR1E2    | rs17133693  | 0.04326  | K → R | A → G | benign            | chr10 | 4875591   |
| ALDH3B1   |             | Unknown  | K → R | A → G | benign            | chr11 | 67786273  |
| ALX1      | rs115440539 | 0.007053 | H → R | A → G | benign            | chr12 | 85674221  |
| ANGPTL4   | rs140744493 | 0.001845 | R → C | C → T | probably damaging | chr19 | 8436373   |
| ANKLE2    |             | Unknown  | V → I | G → A | benign            | chr12 | 133313556 |
| ANKRD11   | rs76793093  | 0.042505 | P → S | C → T | benign            | chr16 | 89346163  |
| ANKRD11   | rs60520302  | 0.045494 | A → P | G → C | benign            | chr16 | 89346883  |
| ANKRD18B  | rs41305300  | 0.044333 | Q → R | A → G | probably damaging | chr9  | 38577239  |
| ANKRD20A3 |             | Unknown  | A → S | G → T | probably damaging | chr9  | 67968287  |
| ANKRD20A3 |             | Unknown  | A → V | C → T | possibly damaging | chr9  | 67934748  |
| ANKRD20A3 |             | Unknown  | E → G | A → G | benign            | chr9  | 67927015  |
| ANKRD20A4 |             | Unknown  | A → S | G → T | probably damaging | chr9  | 69423550  |
| ANKRD20A4 |             | Unknown  | V → E | T → A | probably damaging | chr9  | 69423863  |
| ANKRD20A4 | rs79777643  | Unknown  | I → T | T → C | possibly damaging | chr9  | 69423521  |
| ANKRD20A4 |             | Unknown  | Q → E | C → G | possibly damaging | chr9  | 69423844  |
| ANKRD20A4 | rs112196072 | Unknown  | A → V | C → T | benign            | chr9  | 69423368  |
| ANKRD20A4 | rs77680263  | Unknown  | D → E | C → A | benign            | chr9  | 69423519  |
| ANKRD20A4 | rs79174276  | Unknown  | E → K | G → A | benign            | chr9  | 69423700  |
| ANKRD20A4 | rs2982939   | Unknown  | A → T | G → A | benign            | chr9  | 69423721  |
| ANKRD20A4 | rs77404847  | Unknown  | S → T | G → C | benign            | chr9  | 69423755  |
| ANKRD20A4 |             | Unknown  | S → L | C → T | benign            | chr9  | 69423770  |
| ANKRD20A4 |             | Unknown  | T → I | C → T | benign            | chr9  | 69423821  |
| ANKRD20A4 |             | Unknown  | Q → K | C → A | benign            | chr9  | 69423823  |
| ANKRD20A4 |             | Unknown  | N → S | A → G | benign            | chr9  | 69423887  |

|          |             |          |       |       |                   |       |           |
|----------|-------------|----------|-------|-------|-------------------|-------|-----------|
| ANKRD30A | rs41304589  | 0.026965 | Q → E | C → G | benign            | chr10 | 37454048  |
| ANKRD36  | rs62156909  | Unknown  | V → L | G → T | benign            | chr2  | 97909629  |
| ANKRD36B | rs148539055 | Unknown  | Y → C | A → G | probably damaging | chr2  | 98128196  |
| ANKRD36B | rs13001324  | Unknown  | D → N | G → A | possibly damaging | chr2  | 98164020  |
| ANKRD43  | rs40274     | 0.016856 | R → P | G → C | benign            | chr5  | 132149684 |
| ANO2     | rs3741901   | 0.048286 | P → S | C → T | benign            | chr12 | 6030301   |
| ANXA8L2  | rs2271519   | Unknown  | A → V | C → T | possibly damaging | chr10 | 47754794  |
| APOB48R  | rs34395441  | 0.014612 | E → K | G → A | benign            | chr16 | 28508892  |
| AQP7     | rs4008658   | 0.021028 | K → T | A → C | benign            | chr9  | 33387047  |
| ARFGAP3  | rs9607957   | 0.02585  | S → G | A → G | benign            | chr22 | 43218397  |
| ARHGEF5  | rs3823677   | Unknown  | T → I | C → T | benign            | chr7  | 144060802 |
| ARRB1    |             | Unknown  | T → P | A → C | benign            | chr11 | 74989724  |
| ASPM     | rs12138336  | 0.044173 | Q → H | G → C | benign            | chr1  | 197070521 |
| ATF1     | rs2230674   | 0.016437 | P → A | C → G | probably damaging | chr12 | 51208122  |
| ATM      | rs3218707   | 0.008777 | V → I | G → A | benign            | chr11 | 108114727 |
| ATP12A   | rs56291145  | 0.023348 | N → H | A → C | benign            | chr13 | 25267017  |
| ATP5I    | rs76028807  | 0.010738 | L → F | C → T | benign            | chr4  | 668009    |
| B3GALT6  |             | Unknown  | A → V | C → T | benign            | chr1  | 1168173   |
| BAG1     | rs1071545   | 0.031378 | G → R | G → C | benign            | chr9  | 33264540  |
| BCAP31   |             | Unknown  | N → S | A → G | benign            | chrX  | 152969493 |
| BCLAF1   | rs1967446   | 0.011848 | Y → D | T → G | possibly damaging | chr6  | 136597288 |
| BCMO1    | rs143238312 | 0.007692 | G → A | G → C | probably damaging | chr16 | 81323953  |
| BMP2K    | rs116710382 | 0.005633 | N → Y | A → T | benign            | chr4  | 79832870  |
| BMPR1A   | rs3182217   | Unknown  | P → T | C → A | benign            | chr10 | 88635779  |
| BRIP1    | rs147755155 | 0.00044  | P → L | C → T | probably damaging | chr17 | 59853772  |
| BSG      | rs144824657 | Unknown  | V → F | G → T | possibly damaging | chr19 | 577782    |
| C12orf10 | rs71453838  | Unknown  | Q → H | A → C | benign            | chr12 | 53693533  |
| C14orf73 | rs34558946  | Unknown  | Q → E | C → G | benign            | chr14 | 103576444 |
| C16orf11 | rs113068385 | 0.012785 | R → Q | G → A | benign            | chr16 | 615048    |

|           |             |          |       |       |                   |       |           |
|-----------|-------------|----------|-------|-------|-------------------|-------|-----------|
| C16orf38  | rs61751878  | 0.005263 | R → H | G → A | possibly damaging | chr16 | 1536466   |
| C16orf68  | rs1731000   | 0.008601 | A → T | G → A | benign            | chr16 | 8738499   |
| C19orf38  | rs73009507  | 0.041096 | P → A | C → G | probably damaging | chr19 | 10961024  |
| C1orf63   | rs34619962  | 0.004256 | Y → H | T → C | probably damaging | chr1  | 25573016  |
| C1orf88   | rs15396     | 0.042455 | K → N | A → C | benign            | chr1  | 111891170 |
| C1QTNF9   | rs3751356   | Unknown  | R → Q | G → A | benign            | chr13 | 24895437  |
| C20orf114 | rs61739245  | 0.012184 | I → F | A → T | probably damaging | chr20 | 31877713  |
| C2orf50   |             | Unknown  | P → A | C → G | benign            | chr2  | 11284061  |
| C6orf10   | rs7775397   | 0.03022  | K → Q | A → C | probably damaging | chr6  | 32261252  |
| C6orf103  | rs78851618  | 0.02643  | I → T | T → C | possibly damaging | chr6  | 147047296 |
| C6orf15   | rs2233982   | 0.040062 | M → I | G → A | possibly damaging | chr6  | 31079440  |
| C6orf201  | rs13200786  | 0.042705 | D → V | A → T | probably damaging | chr6  | 4087949   |
| C6orf211  | rs140681772 | 0.001067 | H → Y | C → T | possibly damaging | chr6  | 151790096 |
| C6orf27   | rs3101017   | 0.043845 | T → A | A → G | benign            | chr6  | 31733466  |
| C7orf28B  | rs62441800  | Unknown  | M → I | G → C | benign            | chr7  | 6844574   |
| C8orf45   | rs17332410  | 0.044768 | L → V | C → G | possibly damaging | chr8  | 67796120  |
| C8orf85   | rs111477672 | 0.035192 | Q → H | G → T | probably damaging | chr8  | 117950758 |
| CA9       | rs77984049  | 0.044944 | R → W | A → T | probably damaging | chr9  | 35674347  |
| CACNA1F   | rs34162630  | 0.016741 | R → Q | G → A | probably damaging | chrX  | 49082499  |
| CACNA1G   | rs116920450 | 0.004333 | R → Q | G → A | benign            | chr17 | 48653130  |
| CALD1     | rs61755271  | 0.002123 | R → K | G → A | benign            | chr7  | 134617996 |
| CALHM1    | rs41287500  | 0.014416 | M → I | G → A | benign            | chr10 | 105215091 |
| CALHM1    | rs41287502  | 0.014653 | G → C | G → T | benign            | chr10 | 105215216 |
| CARS2     |             | Unknown  | N → S | A → G | benign            | chr13 | 111340361 |
| CASP9     | rs2308941   | 0.007995 | T → I | C → T | benign            | chr1  | 15844718  |
| CATSPERB  | rs72629402  | 0.043168 | V → A | T → C | benign            | chr14 | 92159558  |
| CBX2      | rs141957173 | 0.004819 | P → A | C → G | benign            | chr17 | 77758653  |
| CCDC144A  | rs3869489   | Unknown  | E → K | G → A | benign            | chr17 | 16664991  |
| CCDC76    | rs35216047  | Unknown  | A → V | C → T | benign            | chr1  | 100598867 |

|          |             |          |       |       |                   |       |           |
|----------|-------------|----------|-------|-------|-------------------|-------|-----------|
| CCL25    | rs74959615  | 0.037695 | R → H | G → A | benign            | chr19 | 8121096   |
| CD200R1  | rs71625219  | 0.5      | P → T | A → C | probably damaging | chr3  | 112648127 |
| CD248    | rs74818906  | 0.007567 | A → T | G → A | benign            | chr11 | 66083043  |
| CDC27    | rs75661039  | Unknown  | H → Q | T → A | probably damaging | chr17 | 45214604  |
| CDC27    | rs74390782  | Unknown  | R → W | C → T | probably damaging | chr17 | 45214690  |
| CDC27    | rs62075657  | Unknown  | L → F | A → C | probably damaging | chr17 | 45216132  |
| CDC27    | rs62077268  | Unknown  | A → T | G → A | probably damaging | chr17 | 45249365  |
| CDC27    | rs62077279  | Unknown  | E → G | A → G | probably damaging | chr17 | 45266522  |
| CDC27    | rs62077280  | Unknown  | T → A | A → G | probably damaging | chr17 | 45266535  |
| CDC27    | rs74496366  | Unknown  | M → R | T → G | possibly damaging | chr17 | 45219364  |
| CDC27    | rs77095606  | Unknown  | L → W | T → G | possibly damaging | chr17 | 45234477  |
| CDC27    | rs78043820  | Unknown  | R → G | A → G | benign            | chr17 | 45234481  |
| CDC27    | rs74398156  | Unknown  | A → T | G → A | benign            | chr17 | 45235653  |
| CDK5RAP2 | rs34523498  | 0.032542 | G → E | G → A | benign            | chr9  | 123205981 |
| CDRT1    | rs3826385   | Unknown  | N → D | A → G | possibly damaging | chr17 | 15510988  |
| CEP110   | rs77083332  | 0.022983 | L → V | C → G | benign            | chr9  | 123875921 |
| CEP350   |             | Unknown  | S → C | C → G | probably damaging | chr1  | 179983108 |
| CES1     | rs3826193   | Unknown  | I → V | A → G | benign            | chr16 | 55862791  |
| CES1     | rs3826192   | 0.002451 | V → I | G → A | benign            | chr16 | 55862824  |
| CHPF     | rs62191582  | 0.016065 | A → G | C → G | possibly damaging | chr2  | 220404484 |
| CHTF18   | rs61745756  | 0.049377 | R → H | G → A | benign            | chr16 | 839600    |
| CILP     | rs60240130  | Unknown  | G → S | G → A | benign            | chr15 | 65489128  |
| CIT      | rs55707601  | 0.01485  | S → C | C → G | benign            | chr12 | 120263003 |
| CLN5     | rs138611001 | 0.009162 | N → K | C → A | probably damaging | chr13 | 77574606  |
| CNNM2    | rs76057237  | 0.037262 | R → Q | G → A | possibly damaging | chr10 | 104678350 |
| CNR2     | rs35761398  | Unknown  | Q → R | A → G | benign            | chr1  | 24201920  |
| CNTNAP3  | rs10974151  | Unknown  | S → Y | C → A | benign            | chr9  | 39118205  |
| COL14A1  | rs11774228  | 0.007086 | V → I | G → A | benign            | chr8  | 121267490 |
| COL22A1  | rs10111520  | 0.047515 | P → T | C → A | benign            | chr8  | 139749799 |

|                |             |          |       |       |                   |       |           |
|----------------|-------------|----------|-------|-------|-------------------|-------|-----------|
| COL9A3         | rs45628843  | 0.040847 | P → L | C → T | benign            | chr20 | 61459315  |
| CORO1B         | rs11601245  | 0.008226 | A → T | G → A | benign            | chr11 | 67206234  |
| CPA5           | rs17388190  | 0.020798 | P → S | C → T | probably damaging | chr7  | 129989852 |
| CPN1           | rs61751507  | 0.03176  | G → D | G → A | possibly damaging | chr10 | 101829514 |
| CPS1           | rs113635180 | Unknown  | T → A | A → G | benign            | chr2  | 211456637 |
| CRB2           | rs2488601   | 0.003643 | T → A | A → G | benign            | chr9  | 126135715 |
| CSPG4          |             | Unknown  | P → L | C → T | benign            | chr15 | 75982186  |
| CSRP2BP        | rs139667492 | 0.001538 | Y → N | T → A | benign            | chr20 | 18162405  |
| CTAGE4         |             | Unknown  | P → L | C → T | probably damaging | chr7  | 143964428 |
| CTSS           | rs41271951  | 0.047612 | V → A | T → C | benign            | chr1  | 150737220 |
| CUBN           | rs45569534  | 0.014999 | E → Q | G → C | benign            | chr10 | 16930419  |
| CUL7           | rs61748654  | Unknown  | Q → R | A → G | benign            | chr6  | 43014299  |
| CYFIP1         | rs149042952 | 0.008352 | A → V | C → T | possibly damaging | chr15 | 22993121  |
| CYP4X1         |             | Unknown  | S → G | A → G | benign            | chr1  | 47514254  |
| DAPL1          | rs61740880  | 0.019806 | A → V | C → T | possibly damaging | chr2  | 159672251 |
| DCHS2          | rs146032523 | 0.002275 | T → I | C → T | possibly damaging | chr4  | 155191162 |
| DCLK2          | rs67917234  | Unknown  | P → R | C → G | benign            | chr4  | 151177341 |
| DCLK3          | rs35704209  | 0.004562 | E → D | G → T | benign            | chr3  | 36756867  |
| DCTN4          | rs35772018  | 0.009531 | Y → C | A → G | probably damaging | chr5  | 150110239 |
| DDX49          | rs139869066 | 0.006044 | G → S | G → A | possibly damaging | chr19 | 19030611  |
| DDX51          | rs17418886  | Unknown  | Q → R | A → G | possibly damaging | chr12 | 132626668 |
| DGKH           | rs17646069  | 0.044617 | V → A | T → C | benign            | chr13 | 42803263  |
| DGUOK          | rs74874677  | 0.013947 | Q → R | A → G | probably damaging | chr2  | 74177777  |
| DHX16          | rs9262138   | 0.032054 | D → G | A → G | benign            | chr6  | 30627867  |
| DIP2A          | rs7283507   | 0.038516 | P → A | C → G | benign            | chr21 | 47918662  |
| DKFZp434M131   | rs62579097  | Unknown  | T → A | A → G | benign            | chr9  | 90745671  |
| DKFZp686I15204 | rs62538181  | Unknown  | M → I | G → C | benign            | chr9  | 43915893  |
| DNAH10         | rs145483216 | Unknown  | M → V | A → G | probably damaging | chr12 | 124323006 |
| DNAJC13        | rs79953286  | 0.038622 | Y → C | A → G | probably damaging | chr3  | 132226100 |

|          |             |          |       |       |                   |       |           |
|----------|-------------|----------|-------|-------|-------------------|-------|-----------|
| DOCK5    |             | Unknown  | H → Y | C → T | benign            | chr8  | 25159907  |
| DSC1     | rs35338395  | 0.039435 | S → F | C → T | benign            | chr18 | 28737407  |
| DSG2     | rs2230234   | 0.0375   | I → V | A → G | probably damaging | chr18 | 29104714  |
| DSPP     |             | Unknown  | D → N | G → A | probably damaging | chr4  | 88537268  |
| DSPP     | rs140656082 | Unknown  | N → D | A → G | benign            | chr4  | 88537232  |
| DSTYK    |             | Unknown  | E → A | A → C | benign            | chr1  | 205156631 |
| DTHD1    | rs56412718  | 0.015901 | P → T | C → A | probably damaging | chr4  | 36340755  |
| DTX2     | rs12534498  | 0.011409 | V → I | G → A | benign            | chr7  | 76111938  |
| DUSP5    | rs35834951  | Unknown  | A → V | C → T | benign            | chr10 | 112266823 |
| DYDC2    | rs1047951   | 0.019731 | G → S | G → A | benign            | chr10 | 82126600  |
| E2F7     | rs61754233  | 0.010537 | P → R | C → G | possibly damaging | chr12 | 77439823  |
| ECT2L    | rs138935097 | Unknown  | V → A | T → C | benign            | chr6  | 139202137 |
| EFEMP2   |             | Unknown  | I → V | A → G | benign            | chr11 | 65636053  |
| EFHB     | rs76398910  | 0.028053 | T → I | C → T | possibly damaging | chr3  | 19924058  |
| EGFLAM   | rs113400125 | 0.019881 | R → C | C → T | benign            | chr5  | 38406251  |
| EIF4G1   | rs111924994 | 0.001797 | A → P | G → C | benign            | chr3  | 184040371 |
| EIF5AL1  | rs1250783   | Unknown  | V → L | G → C | possibly damaging | chr10 | 81272814  |
| ELL3     | rs34636853  | 0.00339  | P → L | C → T | possibly damaging | chr15 | 44066904  |
| EPS8L1   | rs144463157 | 0.006817 | G → R | G → C | probably damaging | chr19 | 55593837  |
| ERI2     | rs149105300 | 0.001103 | G → R | G → A | possibly damaging | chr16 | 20814940  |
| ERO1LB   | rs35648587  | 0.00353  | K → N | A → C | benign            | chr1  | 236433208 |
| FAAH     | rs114795065 | 0.000958 | R → H | G → A | probably damaging | chr1  | 46871409  |
| FAM113A  | rs147321844 | 0.00044  | P → L | C → T | benign            | chr20 | 2816292   |
| FAM120B  | rs113032155 | 0.041588 | D → G | A → G | benign            | chr6  | 170627695 |
| FAM122C  | rs45447592  | 0.030882 | P → S | C → T | benign            | chrX  | 133963268 |
| FAM133A  | rs34123774  | 0.030604 | E → K | G → A | benign            | chrX  | 92964617  |
| FAM157B  |             | Unknown  | T → R | C → G | possibly damaging | chr9  | 141111600 |
| FAM164A  | rs77219198  | 0.013064 | S → F | C → T | probably damaging | chr8  | 79629586  |
| FAM171A1 |             | Unknown  | M → R | T → G | probably damaging | chr10 | 15262960  |

|          |             |          |       |       |                   |       |           |
|----------|-------------|----------|-------|-------|-------------------|-------|-----------|
| FAM186A  |             | Unknown  | T → P | A → C | benign            | chr12 | 50745703  |
| FAM189A1 | rs34232112  | Unknown  | H → R | A → G | benign            | chr15 | 29418574  |
| FAM22D   | rs139769515 | Unknown  | C → S | G → C | benign            | chr10 | 89120661  |
| FAM22F   | rs2479282   | Unknown  | R → G | A → G | benign            | chr9  | 97087707  |
| FAM26F   | rs11544160  | 0.044724 | E → K | G → A | benign            | chr6  | 116784797 |
| FAM75A2  | rs6476797   | Unknown  | A → T | G → A | benign            | chr9  | 39360949  |
| FAM75A6  | rs10907643  | Unknown  | P → L | C → T | benign            | chr9  | 43625382  |
| FANCB    | rs41309679  | 0.048599 | G → E | G → A | probably damaging | chrX  | 14877404  |
| FANCM    | rs45547534  | 0.009053 | I → M | A → G | probably damaging | chr14 | 45606387  |
| FARP1    | rs61749894  | 0.002861 | R → C | C → T | probably damaging | chr13 | 99092998  |
| FASN     | rs12946178  | 0.003426 | E → K | G → A | probably damaging | chr17 | 80046994  |
| FAT1     | rs1280098   | 0.002245 | Q → P | A → C | benign            | chr4  | 187538942 |
| FAT4     | rs72675395  | 0.014396 | R → K | G → A | probably damaging | chr4  | 126412154 |
| FCGBP    | rs6508919   | Unknown  | G → S | G → A | probably damaging | chr19 | 40367567  |
| FCRL2    | rs138710224 | 0.001318 | L → M | C → A | possibly damaging | chr1  | 157738309 |
| FER1L6   | rs56132579  | 0.038562 | R → Q | G → A | probably damaging | chr8  | 125115420 |
| FEZ2     | rs1544655   | 0.00228  | P → L | C → T | benign            | chr2  | 36825137  |
| FGFR1OP  | rs61751042  | 0.021158 | T → I | C → T | possibly damaging | chr6  | 167435928 |
| FGFR1OP  | rs17856382  | 0.030109 | K → N | G → T | benign            | chr6  | 167438276 |
| FGFR1OP  | rs34585172  | 0.021577 | S → P | T → C | benign            | chr6  | 167438364 |
| FHOD3    | rs61735994  | 0.021945 | Q → R | A → G | benign            | chr18 | 34289142  |
| FLG      | rs77166567  | Unknown  | D → N | G → A | probably damaging | chr1  | 152280347 |
| FNBP4    | rs112054219 | Unknown  | T → S | C → G | benign            | chr11 | 47788731  |
| FNDC1    | rs62432291  | 0.024201 | P → S | C → T | probably damaging | chr6  | 159621087 |
| FNDC3A   | rs45604939  | 0.042696 | T → A | A → G | possibly damaging | chr13 | 49775997  |
| FOLH1B   | rs145858863 | 0.020774 | V → A | T → C | benign            | chr11 | 89413795  |
| FOXD4L1  |             | Unknown  | A → P | G → C | possibly damaging | chr2  | 114257590 |
| FOXO3    | rs111556510 | 0.029224 | A → V | C → T | benign            | chr6  | 108882830 |
| FOXQ1    | rs148598230 | Unknown  | L → P | T → C | probably damaging | chr6  | 1312998   |



|         |             |          |       |       |                   |       |           |
|---------|-------------|----------|-------|-------|-------------------|-------|-----------|
| FRG1    | rs1803592   | Unknown  | K → E | A → G | benign            | chr4  | 190873379 |
| FRG1    | rs1061653   | Unknown  | G → E | G → A | benign            | chr4  | 190876242 |
| FRG1    | rs150472183 | Unknown  | Q → K | C → A | benign            | chr4  | 190876301 |
| FRG1    | rs184307882 | Unknown  | K → E | A → G | benign            | chr4  | 190881933 |
| FRG1    | rs75206851  | Unknown  | R → Q | G → A | benign            | chr4  | 190883051 |
| FRG2B   |             | Unknown  | D → H | G → C | possibly damaging | chr10 | 135440144 |
| FRG2B   |             | Unknown  | I → T | T → C | benign            | chr10 | 135440080 |
| FRG2B   | rs78279965  | Unknown  | T → S | A → T | benign            | chr10 | 135440159 |
| FRG2B   | rs75987380  | Unknown  | H → Q | C → G | benign            | chr10 | 135440214 |
| FRG2B   | rs79777505  | Unknown  | H → Y | C → T | benign            | chr10 | 135440216 |
| FRMD1   | rs73028318  | 0.00371  | R → Q | G → A | benign            | chr6  | 168464402 |
| FRYL    | rs145522900 | Unknown  | V → I | G → A | benign            | chr4  | 48583490  |
| GAL3ST2 |             | Unknown  | D → E | C → A | probably damaging | chr2  | 242743392 |
| GBP1    | rs75161612  | 0.016957 | S → N | G → A | benign            | chr1  | 89523911  |
| GGT1    | rs186765281 | Unknown  | I → V | A → G | possibly damaging | chr22 | 25010855  |
| GIMAP6  | rs62000976  | 0.002349 | S → L | C → T | benign            | chr7  | 150325372 |
| GLB1L   | rs147143842 | 0.008884 | R → W | C → T | probably damaging | chr2  | 220107997 |
| GLYCTK  | rs121909448 | 0.00022  | F → C | T → G | probably damaging | chr3  | 52327048  |
| GNAS    | rs61749697  | 0.02253  | P → L | C → T | benign            | chr20 | 57429447  |
| GOLGA6A |             | Unknown  | E → K | G → A | probably damaging | chr15 | 74367283  |
| GOLGA6A |             | Unknown  | Q → R | A → G | benign            | chr15 | 74367066  |
| GOLGA6A |             | Unknown  | Q → L | A → T | benign            | chr15 | 74367120  |
| GOLGA6A |             | Unknown  | P → L | C → T | benign            | chr15 | 74367333  |
| GOLGA6B |             | Unknown  | R → Q | G → A | benign            | chr15 | 72954890  |
| GOLGA6B |             | Unknown  | R → W | C → T | benign            | chr15 | 72958170  |
| GOLGA6D | rs3895102   | Unknown  | D → G | A → G | benign            | chr15 | 75552784  |
| GOT2    | rs11076256  | 0.049418 | G → S | G → A | possibly damaging | chr16 | 58752466  |
| GPA33   | rs72689400  | 0.008754 | V → F | G → T | probably damaging | chr1  | 167038219 |
| GPR115  | rs115890838 | 0.010834 | V → I | G → A | benign            | chr6  | 47682212  |

|          |             |          |       |       |                   |       |           |
|----------|-------------|----------|-------|-------|-------------------|-------|-----------|
| GPR137C  | rs147785041 | Unknown  | S → G | A → G | benign            | chr14 | 53019944  |
| GPR88    | rs2809819   | 0.000913 | V → I | G → A | benign            | chr1  | 101005090 |
| GPRIN2   | rs71185249  | Unknown  | S → G | A → G | benign            | chr10 | 46999190  |
| GPX1     | rs1050450   | 0.036435 | P → L | C → T | benign            | chr3  | 49394834  |
| GSPT1    | rs424518    | 0.003643 | V → A | T → C | benign            | chr16 | 12009279  |
| GTPBP5   |             | Unknown  | M → V | A → G | benign            | chr20 | 60773906  |
| GTSF1L   | rs17826038  | 0.016799 | L → V | C → G | probably damaging | chr20 | 42355169  |
| HACL1    |             | Unknown  | E → Q | G → C | benign            | chr3  | 15628058  |
| HAPLN1   |             | Unknown  | F → L | C → G | benign            | chr5  | 82940384  |
| HAUS6    | rs4977493   | Unknown  | S → I | G → T | probably damaging | chr9  | 19058483  |
| HCN4     | rs143090627 | Unknown  | G → E | G → A | benign            | chr15 | 73660505  |
| HDGFL1   |             | Unknown  | E → K | G → A | possibly damaging | chr6  | 22570483  |
| HEATR5A  | rs61754287  | 0.007799 | M → T | T → C | benign            | chr14 | 31819145  |
| HEPH     | rs17216603  | 0.003094 | A → T | G → A | benign            | chrX  | 65418789  |
| HERC2    | rs2525965   | Unknown  | F → L | C → G | possibly damaging | chr15 | 28566562  |
| HGF      | rs5745687   | 0.040296 | E → K | G → A | benign            | chr7  | 81359051  |
| HLA-A    | rs3180267   | Unknown  | I → R | T → G | benign            | chr6  | 29911063  |
| HLA-A    | rs1059526   | 0        | A → T | G → A | benign            | chr6  | 29911218  |
| HLA-DQA1 | rs1129957   | Unknown  | Q → K | C → A | benign            | chr6  | 32610009  |
| HOMER3   | rs1059240   | 0.007706 | S → R | C → G | benign            | chr19 | 19040312  |
| HOOK1    | rs41312662  | 0.016831 | I → V | A → G | benign            | chr1  | 60299125  |
| HOXA4    |             | Unknown  | L → M | T → A | probably damaging | chr7  | 27169047  |
| HPS1     | rs11592273  | 0.044384 | G → W | G → T | probably damaging | chr10 | 100189568 |
| HR       | rs117197822 | 0.014067 | R → Q | G → A | probably damaging | chr8  | 21981218  |
| HRNR     | rs76549374  | Unknown  | E → K | G → A | possibly damaging | chr1  | 152190945 |
| HS3ST4   | rs2943336   | 0.000913 | R → Q | A → G | possibly damaging | chr16 | 25704145  |
| HS6ST1   |             | Unknown  | S → T | G → C | benign            | chr2  | 129076016 |
| HYAL4    | rs149028871 | 0.000222 | L → F | C → T | benign            | chr7  | 123508397 |
| HYDIN    | rs1798314   | 0.027638 | E → Q | G → C | probably damaging | chr16 | 70884524  |

|          |             |          |       |       |                   |       |           |
|----------|-------------|----------|-------|-------|-------------------|-------|-----------|
| HYDIN    | rs3817211   | 0.009017 | N → D | A → G | probably damaging | chr16 | 71098649  |
| HYDIN    | rs1774449   | 0.004072 | I → S | T → G | benign            | chr16 | 70942688  |
| HYDIN    | rs1774513   | 0.020548 | V → L | G → C | benign            | chr16 | 71026076  |
| IFIH1    | rs35667974  | 0.00796  | I → V | A → G | probably damaging | chr2  | 163124637 |
| IFNA7    | rs149946231 | 0.005275 | V → L | G → T | benign            | chr9  | 21201780  |
| IGSF11   |             | Unknown  | Q → H | G → T | benign            | chr3  | 118623641 |
| IGSF22   | rs11024769  | 0.044015 | L → F | C → T | possibly damaging | chr11 | 18735465  |
| IGSF3    | rs76151115  | 0.004955 | R → Q | G → A | probably damaging | chr1  | 117142613 |
| IGSF3    | rs76417519  | 0.002655 | R → W | C → T | probably damaging | chr1  | 117142641 |
| IGSF5    | rs142105354 | 0.002419 | R → Q | G → A | benign            | chr21 | 41173190  |
| IL17RD   | rs143416217 | 0.000452 | T → I | C → T | benign            | chr3  | 57137154  |
| IL28B    | rs62120527  | 0.00939  | E → K | G → A | probably damaging | chr19 | 39734352  |
| IL28B    | rs138893424 | 0.011664 | L → F | C → T | benign            | chr19 | 39735517  |
| INA      | rs34440112  | 0.022594 | I → L | A → C | benign            | chr10 | 105048217 |
| INSM2    | rs144835486 | Unknown  | P → S | C → T | benign            | chr14 | 36003618  |
| IRAK1BP1 | rs41269339  | 0.022941 | P → R | C → G | benign            | chr6  | 79577412  |
| IRS1     | rs13306469  | 0.011407 | G → S | G → A | benign            | chr2  | 227661291 |
| IRX3     | rs1450355   | 0.003643 | L → P | T → C | benign            | chr16 | 54318528  |
| ISCU     | rs67681514  | 0.5      | F → C | T → G | benign            | chr12 | 108956418 |
| JPH3     | rs149647215 | 0.003175 | G → S | G → A | benign            | chr16 | 87677887  |
| KANK4    | rs34591898  | 0.024802 | A → V | C → T | benign            | chr1  | 62703977  |
| KCNJ14   | rs73050908  | 0.007895 | A → V | C → T | benign            | chr19 | 48968015  |
| KIAA0284 | rs62641737  | 0.0124   | S → F | C → T | possibly damaging | chr14 | 105352651 |
| KIAA0564 | rs2274810   | 0.041474 | E → K | G → A | benign            | chr13 | 42264380  |
| KIAA1409 | rs79866114  | 0.010089 | L → V | C → G | probably damaging | chr14 | 93963563  |
| KIF15    | rs138043992 | 0.002141 | R → L | G → T | probably damaging | chr3  | 44843459  |
| KIF21B   | rs140589352 | 0.014499 | S → L | C → T | possibly damaging | chr1  | 200978027 |
| KIF26A   | rs61743202  | 0.026009 | K → R | A → G | benign            | chr14 | 104644212 |
| KIF4A    |             | Unknown  | L → R | T → G | probably damaging | chrX  | 69595143  |

|           |             |          |       |       |                   |       |           |
|-----------|-------------|----------|-------|-------|-------------------|-------|-----------|
| KLHDC9    | rs1128750   | 0.038997 | A → T | G → A | benign            | chr1  | 161069544 |
| KLHL38    | rs71505429  | Unknown  | H → R | A → G | benign            | chr8  | 124664874 |
| KLRC2     | rs1141715   | Unknown  | S → F | T → C | benign            | chr12 | 10587111  |
| KRT17     |             | Unknown  | R → L | G → T | benign            | chr17 | 39778707  |
| KRT39     | rs143643076 | 0.006661 | G → E | G → A | benign            | chr17 | 39115049  |
| KRT6B     | rs144860693 | 0.037265 | G → R | G → A | benign            | chr12 | 52845574  |
| KRT6C     | rs28538343  | Unknown  | S → N | G → A | benign            | chr12 | 52867094  |
| KRT86     | rs58717266  | Unknown  | Q → P | A → C | possibly damaging | chr12 | 52696930  |
| KRTAP10-1 | rs233316    | 0.004096 | P → L | C → T | probably damaging | chr21 | 45959195  |
| KRTAP10-1 | rs233319    | 0.003643 | V → M | G → A | probably damaging | chr21 | 45959733  |
| KRTAP10-1 | rs34549147  | Unknown  | D → Y | G → T | possibly damaging | chr21 | 45959559  |
| KRTAP10-6 | rs75991593  | Unknown  | R → H | G → A | benign            | chr21 | 46012181  |
| KRTAP10-7 | rs7410162   | Unknown  | R → C | C → T | benign            | chr21 | 46020720  |
| KRTAP10-7 | rs4818725   | Unknown  | R → H | G → A | benign            | chr21 | 46020721  |
| KRTAP10-9 | rs142813376 | Unknown  | V → M | G → A | possibly damaging | chr21 | 46047779  |
| KRTAP22-1 | rs724849    | 0.029769 | Y → C | A → G | benign            | chr21 | 31973525  |
| KRTAP4-7  | rs11650261  | Unknown  | R → H | G → A | probably damaging | chr17 | 39240790  |
| KRTAP4-7  | rs9894966   | Unknown  | S → C | A → T | benign            | chr17 | 39240795  |
| KRTAP5-5  | rs147101544 | Unknown  | P → H | C → A | probably damaging | chr11 | 1651555   |
| KRTAP5-7  | rs147685834 | Unknown  | C → S | G → C | possibly damaging | chr11 | 71238453  |
| LAMA4     | rs71543223  | Unknown  | A → E | C → A | benign            | chr6  | 112508770 |
| LAMB1     | rs35915664  | 0.014378 | I → T | T → C | probably damaging | chr7  | 107569962 |
| LAX1      | rs41264261  | 0.020323 | P → S | C → T | possibly damaging | chr1  | 203743798 |
| LBP       | rs5744212   | 0.004267 | L → F | C → T | possibly damaging | chr20 | 36997672  |
| LCMT2     | rs142368943 | 0.004344 | T → I | C → T | benign            | chr15 | 43621741  |
| LDLRAD3   |             | Unknown  | H → P | A → C | probably damaging | chr11 | 36248854  |
| LGALS8    | rs35499589  | Unknown  | M → V | A → G | benign            | chr1  | 236702210 |
| LGR6      |             | Unknown  | V → A | T → C | benign            | chr1  | 202287443 |
| LIG4      | rs1805389   | 0.045323 | A → V | C → T | benign            | chr13 | 108863609 |

|           |             |          |       |       |                   |       |           |
|-----------|-------------|----------|-------|-------|-------------------|-------|-----------|
| LILRB3    |             | Unknown  | G → R | G → A | possibly damaging | chr19 | 54725913  |
| LILRB3    |             | Unknown  | H → Y | C → T | benign            | chr19 | 54724443  |
| LILRB3    | rs1052995   | 0.000913 | Y → C | A → G | benign            | chr19 | 54724457  |
| LILRB3    | rs1052968   | Unknown  | T → N | C → A | benign            | chr19 | 54725798  |
| LILRB3    | rs4023899   | Unknown  | R → G | C → G | benign            | chr19 | 54725835  |
| LIPI      | rs141732671 | 0.009894 | H → D | C → G | probably damaging | chr21 | 15579196  |
| LMAN1     | rs1043302   | 0.032366 | R → Q | G → A | benign            | chr18 | 57026436  |
| LOC390594 | rs146917406 | Unknown  | G → D | G → A | probably damaging | chr15 | 65369947  |
| LOC440563 | rs1737105   | Unknown  | D → G | A → G | benign            | chr1  | 13183511  |
| LOC643854 | rs4897534   | Unknown  | L → V | C → G | probably damaging | chr6  | 132030966 |
| LOC643854 |             | Unknown  | I → V | A → G | benign            | chr6  | 132032010 |
| LOC653545 |             | Unknown  | G → S | G → A | probably damaging | chr10 | 135491077 |
| LOC653545 |             | Unknown  | G → S | G → A | benign            | chr10 | 135491056 |
| LOC653545 |             | Unknown  | G → S | G → A | benign            | chr10 | 135491083 |
| LPHN2     | rs112681863 | 0.008639 | P → S | C → T | probably damaging | chr1  | 82416040  |
| LPL       | rs1801177   | 0.025829 | D → N | G → A | benign            | chr8  | 19805708  |
| LRRRC16B  | rs117092113 | 0.025292 | R → H | G → A | probably damaging | chr14 | 24533474  |
| LRRRC37A3 | rs62071406  | Unknown  | S → T | T → A | possibly damaging | chr17 | 62892271  |
| LRRFIP2   | rs36068826  | 0.017485 | Y → C | A → G | benign            | chr3  | 37151157  |
| LRRK2     | rs35303786  | 0.008914 | M → T | T → C | benign            | chr12 | 40713899  |
| LRWD1     | rs35310665  | 0.042009 | K → R | A → G | benign            | chr7  | 102108263 |
| LYZL1     | rs2532753   | Unknown  | K → R | A → G | possibly damaging | chr10 | 29578084  |
| MAD1L1    | rs1801368   | 0.00928  | R → H | G → A | benign            | chr7  | 1976457   |
| MAGEA4    | rs41302158  | 0.002402 | S → F | C → T | benign            | chrX  | 151092258 |
| MAPK15    | rs56038219  | 0.021231 | S → P | T → C | probably damaging | chr8  | 144804299 |
| MARVELD2  | rs139854607 | 0.003956 | Q → R | A → G | benign            | chr5  | 68715712  |
| MASP2     | rs141145402 | 0.000662 | T → M | C → T | probably damaging | chr1  | 11106642  |
| MAST2     | rs33931638  | 0.035714 | V → M | G → A | possibly damaging | chr1  | 46500251  |
| MAST2     | rs1052607   | 0.035072 | K → R | A → G | benign            | chr1  | 46499526  |

|         |             |          |       |       |                   |       |           |
|---------|-------------|----------|-------|-------|-------------------|-------|-----------|
| MAST3   |             | Unknown  | R → H | G → A | possibly damaging | chr19 | 18241327  |
| MBD4    | rs78782061  | 0.001986 | N → S | A → G | possibly damaging | chr3  | 129152704 |
| MCC     | rs348942    | 0.000913 | S → G | A → G | benign            | chr5  | 112824039 |
| MED25   | rs145770066 | 0.004491 | A → V | C → T | benign            | chr19 | 50334047  |
| MEGF6   |             | Unknown  | A → T | G → A | possibly damaging | chr1  | 3416227   |
| METTL2A | rs2319055   | 0.000913 | L → P | T → C | benign            | chr17 | 60503921  |
| MGLL    |             | Unknown  | N → I | A → T | benign            | chr3  | 127411093 |
| MIA3    | rs2936053   | 0.000453 | K → E | A → G | benign            | chr1  | 222802006 |
| MICALCL | rs3812754   | Unknown  | T → P | A → C | possibly damaging | chr11 | 12316389  |
| MLL3    | rs4024419   | Unknown  | G → E | G → A | probably damaging | chr7  | 151935910 |
| MLL3    | rs56850341  | Unknown  | L → F | C → T | probably damaging | chr7  | 151970931 |
| MLL3    | rs4024453   | 0.049522 | S → L | C → T | possibly damaging | chr7  | 151945204 |
| MLL3    | rs13231116  | 0.017429 | P → T | C → A | benign            | chr7  | 151877127 |
| MLL4    | rs80216638  | 0.040295 | T → N | C → A | benign            | chr19 | 36211742  |
| MMEL1   | rs147088948 | 0.00022  | S → G | A → G | probably damaging | chr1  | 2523012   |
| MMP27   | rs61754772  | 0.012621 | K → R | A → G | benign            | chr11 | 102575379 |
| MPDZ    | rs150038177 | Unknown  | K → E | A → G | possibly damaging | chr9  | 13186355  |
| MPDZ    | rs189005767 | Unknown  | T → S | A → T | benign            | chr9  | 13190235  |
| MPP2    | rs70964679  | Unknown  | H → Q | C → G | benign            | chr17 | 41960634  |
| MRC2    | rs143651722 | 0.000417 | R → Q | G → A | probably damaging | chr17 | 60767078  |
| MRPL4   | rs113197610 | 0.011048 | K → T | A → C | benign            | chr19 | 10363251  |
| MRPL53  | rs141704877 | 0.010545 | K → E | A → G | benign            | chr2  | 74699715  |
| MRVI1   | rs35857561  | 0.048063 | P → S | C → T | benign            | chr11 | 10650367  |
| MSH4    | rs5745459   | 0.006049 | Y → C | A → G | probably damaging | chr1  | 76345823  |
| MSN     |             | Unknown  | E → G | A → G | benign            | chrX  | 64956743  |
| MT1E    | rs72818417  | 0.04822  | G → D | G → A | possibly damaging | chr16 | 56660816  |
| MTFR1   | rs151130367 | 0.00022  | D → G | A → G | possibly damaging | chr8  | 66620110  |
| MUC16   | rs12459532  | 0.023737 | P → L | C → T | benign            | chr19 | 9059181   |
| MUC16   | rs59168469  | 0.025571 | R → H | G → A | benign            | chr19 | 9060915   |

|         |             |          |       |       |                   |       |           |
|---------|-------------|----------|-------|-------|-------------------|-------|-----------|
| MUC2    |             | Unknown  | A → T | G → A | benign            | chr11 | 1092715   |
| MUC4    | rs147904363 | Unknown  | Q → H | G → C | unknown           | chr3  | 195507372 |
| MUC4    | rs142066159 | Unknown  | P → L | C → T | probably damaging | chr3  | 195506974 |
| MUC4    | rs142559357 | Unknown  | T → P | A → C | probably damaging | chr3  | 195510707 |
| MUC4    |             | Unknown  | T → M | C → T | probably damaging | chr3  | 195514279 |
| MUC4    |             | Unknown  | D → G | A → G | possibly damaging | chr3  | 195514768 |
| MUC4    | rs77359000  | Unknown  | P → S | C → T | benign            | chr3  | 195506933 |
| MUC4    | rs79358488  | Unknown  | L → P | T → C | benign            | chr3  | 195507166 |
| MUC4    |             | Unknown  | V → A | T → C | benign            | chr3  | 195507226 |
| MUC4    |             | Unknown  | S → A | T → G | benign            | chr3  | 195507338 |
| MUC4    |             | Unknown  | R → P | G → C | benign            | chr3  | 195507412 |
| MUC4    | rs71187742  | 0.5      | A → T | G → A | benign            | chr3  | 195507683 |
| MUC4    |             | Unknown  | D → N | G → A | benign            | chr3  | 195507686 |
| MUC4    |             | Unknown  | L → F | C → T | benign            | chr3  | 195507827 |
| MUC4    | rs145853807 | Unknown  | V → A | T → C | benign            | chr3  | 195510217 |
| MUC4    |             | Unknown  | E → D | G → C | benign            | chr3  | 195510228 |
| MUC4    | rs142766505 | Unknown  | A → T | G → A | benign            | chr3  | 195511523 |
| MUC4    | rs6805660   | Unknown  | T → A | A → G | benign            | chr3  | 195512042 |
| MUC4    |             | Unknown  | D → V | A → T | benign            | chr3  | 195512107 |
| MUC4    |             | Unknown  | I → V | A → G | benign            | chr3  | 195512186 |
| MUC4    |             | Unknown  | M → T | T → C | benign            | chr3  | 195514471 |
| MUC4    |             | Unknown  | A → V | C → T | benign            | chr3  | 195514489 |
| MUC4    |             | Unknown  | A → S | G → T | benign            | chr3  | 195514733 |
| MUC5AC  | rs2860722   | Unknown  | T → M | C → T | possibly damaging | chr11 | 1265786   |
| MUC5AC  | rs4963055   | Unknown  | T → I | C → T | possibly damaging | chr11 | 1269398   |
| MUC5AC  | rs3021164   | Unknown  | G → R | G → C | benign            | chr11 | 1270663   |
| MUC6    | rs34232586  | Unknown  | Q → H | G → T | benign            | chr11 | 1017338   |
| MXRA5   | rs66465405  | Unknown  | A → V | C → T | benign            | chrX  | 3240343   |
| MYADML2 | rs62077244  | 0.014986 | R → W | C → T | probably damaging | chr17 | 79898933  |

|         |             |          |       |       |                   |       |           |
|---------|-------------|----------|-------|-------|-------------------|-------|-----------|
| MYBPC2  | rs61731791  | 0.02866  | T → M | C → T | benign            | chr19 | 50940778  |
| MYH13   |             | Unknown  | M → T | T → C | benign            | chr17 | 10265747  |
| MYOM1   | rs3765623   | 0.046955 | D → N | G → A | possibly damaging | chr18 | 3086065   |
| NAT8    | rs181152984 | Unknown  | T → I | C → T | probably damaging | chr2  | 73868226  |
| NAV2    | rs146720224 | 0.003516 | E → K | G → A | probably damaging | chr11 | 20119222  |
| NBAS    | rs75566418  | 0.002228 | Y → H | T → C | probably damaging | chr2  | 15542296  |
| NBEA    | rs11538677  | 0.038918 | I → V | A → G | possibly damaging | chr13 | 36202269  |
| NBEA    | rs41292197  | 0.021918 | S → G | A → G | benign            | chr13 | 35747681  |
| NBPF10  |             | Unknown  | T → I | C → T | probably damaging | chr1  | 145313405 |
| NBPF10  |             | Unknown  | D → N | A → G | possibly damaging | chr1  | 145327548 |
| NBPF10  |             | Unknown  | Q → L | A → T | possibly damaging | chr1  | 145333841 |
| NBPF10  |             | Unknown  | L → V | C → G | possibly damaging | chr1  | 145352701 |
| NBPF10  |             | Unknown  | E → K | A → G | possibly damaging | chr1  | 145359049 |
| NBPF10  |             | Unknown  | E → D | G → T | possibly damaging | chr1  | 145366857 |
| NBPF10  |             | Unknown  | A → S | G → T | benign            | chr1  | 145302676 |
| NBPF10  | rs3926769   | Unknown  | R → K | A → G | benign            | chr1  | 145302704 |
| NBPF10  | rs3930826   | Unknown  | R → H | A → G | benign            | chr1  | 145330829 |
| NBPF10  |             | Unknown  | V → A | T → C | benign            | chr1  | 145333820 |
| NBPF11  |             | Unknown  | V → I | G → A | benign            | chr1  | 146039032 |
| NBPF11  |             | Unknown  | E → G | A → G | benign            | chr1  | 146039133 |
| NBPF11  |             | Unknown  | E → G | A → G | benign            | chr1  | 147580910 |
| NBPF14  | rs147480284 | 0.047327 | S → I | G → T | possibly damaging | chr1  | 148004783 |
| NBPF14  | rs141981140 | 0.044921 | M → T | T → C | possibly damaging | chr1  | 148009349 |
| NBPF16  |             | Unknown  | Q → L | A → T | probably damaging | chr1  | 148754942 |
| NBPF16  |             | Unknown  | G → S | G → A | possibly damaging | chr1  | 148756448 |
| NBPF16  |             | Unknown  | V → A | T → C | benign            | chr1  | 148754858 |
| NBPF16  |             | Unknown  | V → L | G → T | benign            | chr1  | 148756607 |
| NCOR1   | rs76780359  | Unknown  | E → K | G → A | probably damaging | chr17 | 16068340  |
| NDUFAF1 | rs35227875  | 0.0232   | E → K | G → A | possibly damaging | chr15 | 41688732  |



|        |             |          |       |       |                   |       |           |
|--------|-------------|----------|-------|-------|-------------------|-------|-----------|
| NDUFS8 | rs150278938 | 0.000879 | R → C | C → T | possibly damaging | chr11 | 67799622  |
| NEDD4  | rs1912403   | 0.047977 | M → V | A → G | benign            | chr15 | 56208933  |
| NEFH   |             | Unknown  | V → E | T → A | possibly damaging | chr22 | 29885722  |
| NID2   | rs61747585  | 0.04769  | E → D | G → T | possibly damaging | chr14 | 52508842  |
| NLRP6  | rs6421985   | 0.005002 | M → L | A → C | benign            | chr11 | 280221    |
| NLRP6  | rs7482965   | Unknown  | Y → F | A → T | benign            | chr11 | 280816    |
| NMBR   | rs138994608 | 0.022447 | P → H | C → A | probably damaging | chr6  | 142400020 |
| NOMO1  | rs3895684   | Unknown  | A → V | C → T | benign            | chr16 | 14989420  |
| NOTCH2 | rs61788900  | Unknown  | N → S | A → G | possibly damaging | chr1  | 120572547 |
| NOTCH2 | rs61788901  | Unknown  | E → K | G → A | benign            | chr1  | 120572572 |
| NSD1   |             | Unknown  | A → T | G → A | benign            | chr5  | 176636958 |
| NUP205 | rs148613242 | 0.001099 | A → G | C → G | probably damaging | chr7  | 135258511 |
| OBSCN  | rs1188732   | 0.005906 | C → R | T → C | benign            | chr1  | 228504472 |
| OLA1   |             | Unknown  | P → S | C → T | probably damaging | chr2  | 175094043 |
| OPLAH  | rs55916375  | 0.047227 | V → I | G → A | benign            | chr8  | 145112983 |
| OR10G3 | rs45612332  | 0.036092 | Y → C | A → G | probably damaging | chr14 | 22038562  |
| OR10K2 |             | Unknown  | K → E | A → G | possibly damaging | chr1  | 158390389 |
| OR13G1 | rs56096718  | 0.042169 | V → L | G → C | benign            | chr1  | 247835779 |
| OR11I  | rs144766527 | 0.010765 | S → T | T → A | benign            | chr19 | 15198666  |
| OR2A14 | rs183164379 | Unknown  | A → V | C → T | benign            | chr7  | 143826300 |
| OR2H1  | rs17184086  | 0.041667 | V → M | G → A | probably damaging | chr6  | 29430213  |
| OR2T10 | rs41269353  | 0.014539 | S → A | T → G | benign            | chr1  | 248756502 |
| OR4D9  | rs17501584  | 0.032298 | Q → R | A → G | probably damaging | chr11 | 59282861  |
| OR4D9  | rs141443392 | 0.001319 | R → C | C → T | benign            | chr11 | 59282575  |
| OR4N2  | rs146446158 | 0.002858 | K → T | A → C | benign            | chr14 | 20295873  |
| OR4Q3  | rs75664801  | Unknown  | L → I | C → A | benign            | chr14 | 20215899  |
| OR51A2 | rs1817206   | Unknown  | G → E | G → A | benign            | chr11 | 4976768   |
| OR51L1 | rs61729748  | 0.021445 | N → Y | A → T | probably damaging | chr11 | 5020933   |
| OR5H6  | rs2173236   | 0.000908 | S → L | C → T | benign            | chr3  | 97983391  |

|         |             |          |       |       |                   |       |           |
|---------|-------------|----------|-------|-------|-------------------|-------|-----------|
| OR6P1   | rs41273499  | 0.035095 | R → W | C → T | probably damaging | chr1  | 158532614 |
| OR7A17  | rs139004201 | 0.008568 | G → D | G → A | benign            | chr19 | 14991881  |
| OR8B3   | rs507360    | Unknown  | Q → R | A → G | benign            | chr11 | 124267177 |
| OR9G9   | rs71458233  | Unknown  | T → I | C → T | benign            | chr11 | 56468048  |
| OR9G9   | rs11228735  | 0.03271  | E → K | G → A | benign            | chr11 | 56468416  |
| OVGP1   | rs3835606   | Unknown  | S → P | T → C | benign            | chr1  | 111957592 |
| P704P   | rs71228614  | 0.5      | S → L | C → T | probably damaging | chr14 | 20020201  |
| PATL1   |             | Unknown  | I → T | T → C | probably damaging | chr11 | 59426391  |
| PAX1    | rs142565607 | 0.000665 | K → R | A → G | possibly damaging | chr20 | 21687460  |
| PCMTD1  | rs62506083  | Unknown  | N → T | A → C | benign            | chr8  | 52733128  |
| PCNXL2  | rs74503807  | 0.016031 | A → V | C → T | possibly damaging | chr1  | 233353901 |
| PCNXL2  | rs41307684  | 0.016464 | A → E | C → A | benign            | chr1  | 233313594 |
| PCOLCE  | rs117595600 | 0.004168 | R → W | C → T | possibly damaging | chr7  | 100205703 |
| PDZK1   | rs148919265 | 0.00713  | G → S | G → A | benign            | chr1  | 145748503 |
| PER2    | rs35333999  | 0.027829 | V → I | G → A | probably damaging | chr2  | 239161957 |
| PEX1    |             | Unknown  | I → M | A → G | benign            | chr7  | 92132493  |
| PGLYRP2 | rs2304200   | 0.045739 | R → W | C → T | possibly damaging | chr19 | 15580658  |
| PHC2    | rs41265897  | 0.02247  | A → V | C → T | benign            | chr1  | 33836164  |
| PI4K2B  | rs313549    | 0.000887 | S → P | T → C | benign            | chr4  | 25236017  |
| PIGQ    | rs71391136  | 0.5      | C → Y | G → A | benign            | chr16 | 633354    |
| PIK3CG  | rs61749915  | 0.0132   | N → S | A → G | benign            | chr7  | 106509571 |
| PIK3R2  | rs149081991 | Unknown  | A → T | G → A | benign            | chr19 | 18280096  |
| PITRM1  | rs17849904  | 0.045187 | V → I | G → A | benign            | chr10 | 3181126   |
| PKD1    | rs40433     | 0.046207 | R → Q | G → A | benign            | chr16 | 2164808   |
| PKD1L2  | rs1453325   | 0.00771  | N → D | A → G | benign            | chr16 | 81190601  |
| PKHD1L1 | rs62508075  | 0.019635 | I → V | A → G | probably damaging | chr8  | 110397780 |
| PLEC1   | rs35858667  | 0.04244  | A → V | C → T | benign            | chr8  | 144994888 |
| PLEKHA4 | rs62127976  | 0.019352 | S → Y | C → A | probably damaging | chr19 | 49370819  |
| PLXNA3  | rs139336954 | 0.004341 | P → L | C → T | benign            | chrX  | 153693126 |

|          |             |          |       |       |                   |       |           |
|----------|-------------|----------|-------|-------|-------------------|-------|-----------|
| PLXNB2   | rs11547731  | 0.002735 | I → V | A → G | probably damaging | chr22 | 50722134  |
| PMS2     | rs1802683   | Unknown  | G → A | G → C | benign            | chr7  | 6013049   |
| PNMAL1   | rs111356009 | 0.011337 | V → M | G → A | possibly damaging | chr19 | 46973707  |
| PNPLA7   | rs61747535  | 0.043183 | W → S | G → C | probably damaging | chr9  | 140373575 |
| POLR1A   | rs146078741 | Unknown  | R → P | G → C | benign            | chr2  | 86317012  |
| POP1     | rs61743394  | 0.001082 | G → D | G → A | probably damaging | chr8  | 99135639  |
| POTEC    | rs28709987  | Unknown  | H → D | C → G | benign            | chr18 | 14542890  |
| POTED    | rs56121372  | Unknown  | H → Y | C → T | probably damaging | chr21 | 14987811  |
| POTED    | rs55653693  | Unknown  | D → Y | G → T | probably damaging | chr21 | 14987871  |
| POTED    |             | Unknown  | M → T | T → C | benign            | chr21 | 14982716  |
| POTEE    |             | Unknown  | P → R | C → G | probably damaging | chr2  | 132021463 |
| PPIAL4A  | rs2691730   | Unknown  | L → P | T → C | benign            | chr1  | 147955256 |
| PPIAL4E  | rs594576    | Unknown  | N → S | A → G | possibly damaging | chr1  | 148644408 |
| PPIAL4G  | rs4306185   | Unknown  | H → R | A → G | benign            | chr1  | 143767643 |
| PPP1R13L |             | Unknown  | F → C | T → G | possibly damaging | chr19 | 45900279  |
| PPP4R4   | rs116524572 | 0.007576 | R → W | C → T | probably damaging | chr14 | 94697644  |
| PRAGMIN  | rs28533138  | 0.028285 | V → M | G → A | probably damaging | chr8  | 8176770   |
| PRAGMIN  | rs56351643  | 0.013877 | P → T | C → A | benign            | chr8  | 8233941   |
| PRAMEF1  | rs2982215   | Unknown  | P → L | C → T | benign            | chr1  | 12856111  |
| PRAMEF2  | rs146271489 | 0.018976 | A → T | G → A | benign            | chr1  | 12921386  |
| PRAMEF20 | rs77164784  | Unknown  | D → N | G → A | possibly damaging | chr1  | 13743058  |
| PRAMEF20 |             | Unknown  | R → G | A → G | benign            | chr1  | 13743085  |
| PRAMEF6  | rs1967669   | Unknown  | C → S | G → C | possibly damaging | chr1  | 13001312  |
| PRAMEF6  | rs4285708   | Unknown  | K → T | A → C | possibly damaging | chr1  | 13365954  |
| PRAMEF6  | rs7419099   | Unknown  | C → Y | G → A | benign            | chr1  | 13001186  |
| PRB3     |             | Unknown  | R → H | G → A | benign            | chr12 | 11420773  |
| PRB4     | rs12308381  | Unknown  | P → T | C → A | probably damaging | chr12 | 11461706  |
| PRELID2  | rs9324996   | 0.036818 | N → S | A → G | benign            | chr5  | 145197565 |
| PRKAG3   | rs33985460  | 0.035463 | R → W | C → T | probably damaging | chr2  | 219691801 |

|         |             |          |       |       |                   |       |           |
|---------|-------------|----------|-------|-------|-------------------|-------|-----------|
| PRMT10  |             | Unknown  | S → T | G → C | benign            | chr4  | 148591832 |
| PRR21   | rs115609219 | 0.036269 | H → Y | C → T | possibly damaging | chr2  | 240982312 |
| PRR21   |             | Unknown  | C → R | T → C | benign            | chr2  | 240981823 |
| PRR21   | rs148163158 | 0.00307  | M → T | T → C | benign            | chr2  | 240982047 |
| PRSS3   |             | Unknown  | V → A | T → C | benign            | chr7  | 142479915 |
| PRSS3   |             | Unknown  | T → I | C → T | benign            | chr7  | 142479954 |
| PRSS3   |             | Unknown  | S → Y | C → A | benign            | chr7  | 142480002 |
| PRSS3   |             | Unknown  | P → S | C → T | benign            | chr7  | 142480067 |
| PRSS3   |             | Unknown  | M → L | A → C | benign            | chr7  | 142481251 |
| PRTN3   | rs150802678 | 0.006266 | R → H | G → A | probably damaging | chr19 | 847944    |
| PSEN1   | rs63750907  | Unknown  | T → I | C → T | probably damaging | chr14 | 73640375  |
| PTF1A   |             | Unknown  | S → R | C → A | probably damaging | chr10 | 23482649  |
| PTGFRN  | rs71483896  | Unknown  | S → T | T → A | benign            | chr1  | 117487711 |
| PTPN12  | rs2230602   | 0.04609  | E → K | G → A | benign            | chr7  | 77265140  |
| PTPN3   |             | Unknown  | R → Q | G → A | probably damaging | chr9  | 112144053 |
| PTPN3   |             | Unknown  | V → M | G → A | benign            | chr9  | 112185089 |
| PTPRE   |             | Unknown  | R → W | C → T | probably damaging | chr10 | 129847916 |
| PTPRO   | rs71459181  | 0.00712  | V → I | G → A | possibly damaging | chr12 | 15661564  |
| PTPRU   | rs141378439 | 0.005326 | R → Q | G → A | probably damaging | chr1  | 29609217  |
| PVRL1   | rs78809001  | 0.007571 | R → Q | G → A | probably damaging | chr11 | 119548402 |
| PWP1    | rs11547907  | 0.034415 | L → F | G → C | benign            | chr12 | 108096769 |
| RAB33A  | rs11542874  | 0.014459 | L → V | C → G | benign            | chrX  | 129306052 |
| RADIL   | rs414035    | 0.00318  | S → G | A → G | benign            | chr7  | 4841470   |
| RAPGEF5 | rs28716840  | 0.026572 | P → H | C → A | benign            | chr7  | 22202046  |
| RBM12B  | rs150172581 | Unknown  | P → L | C → T | probably damaging | chr8  | 94746933  |
| REST    | rs61754065  | 0.004394 | P → S | C → T | benign            | chr4  | 57797230  |
| REXO1L1 | rs112143831 | Unknown  | P → T | C → A | possibly damaging | chr8  | 86575141  |
| RFTN1   | rs34276015  | 0.033441 | E → K | G → A | possibly damaging | chr3  | 16419309  |
| RGMB    | rs2662263   | 0.004096 | S → R | A → C | benign            | chr5  | 98109838  |

|          |             |          |       |       |                   |       |           |
|----------|-------------|----------|-------|-------|-------------------|-------|-----------|
| RGNEF    |             | Unknown  | V → I | G → A | benign            | chr5  | 73190313  |
| RGPD3    |             | Unknown  | P → S | C → T | probably damaging | chr2  | 107039817 |
| RGPD3    | rs62152468  | Unknown  | E → Q | G → C | possibly damaging | chr2  | 107049714 |
| RGPD3    | rs2912695   | Unknown  | N → D | A → G | benign            | chr2  | 107049681 |
| RGPD3    | rs2556281   | Unknown  | K → N | G → T | benign            | chr2  | 107049703 |
| RNF39    | rs2301752   | 0.049311 | A → T | G → A | possibly damaging | chr6  | 30039418  |
| RNGTT    | rs140205258 | 0.004673 | G → D | G → A | benign            | chr6  | 89601534  |
| RP2      | rs1805147   | 0.003018 | R → W | C → T | possibly damaging | chrX  | 46719498  |
| RRN3     | rs2541719   | Unknown  | S → L | C → T | possibly damaging | chr16 | 15178499  |
| RTEL1    | rs3848668   | 0.04887  | N → S | A → G | benign            | chr20 | 62293272  |
| RTN4RL1  | rs181444163 | Unknown  | G → S | G → A | probably damaging | chr17 | 1840677   |
| SACS     | rs147099630 | 0.006608 | N → S | A → G | benign            | chr13 | 23913549  |
| SBK2     | rs620251    | 0.045061 | A → P | G → C | benign            | chr19 | 56041255  |
| SCARF2   | rs759612    | 0.028741 | V → L | G → C | benign            | chr22 | 20779946  |
| SCARF2   | rs70944210  | Unknown  | D → E | C → G | benign            | chr22 | 20779947  |
| SCNM1    | rs1115      | 0.005394 | E → K | G → A | benign            | chr1  | 151140732 |
| SCRN3    | rs41270195  | 0.026449 | S → I | G → T | benign            | chr2  | 175289259 |
| SDK2     | rs117687984 | 0.006066 | Y → H | T → C | possibly damaging | chr17 | 71468356  |
| SDK2     | rs2270716   | 0.04159  | L → V | C → G | benign            | chr17 | 71380087  |
| SERPINI1 | rs55872908  | 0.0113   | A → T | G → A | benign            | chr3  | 167512569 |
| SETD4    | rs2835239   | 0.033528 | I → V | A → G | possibly damaging | chr21 | 37410477  |
| SEZ6     |             | Unknown  | R → H | G → A | benign            | chr17 | 27291138  |
| SFT2D3   | rs148183380 | Unknown  | E → D | G → T | benign            | chr2  | 128459192 |
| SH2D3A   | rs143503063 | 0.001405 | P → S | C → T | probably damaging | chr19 | 6754093   |
| SHARPIN  | rs11541805  | 0.017834 | P → S | C → T | benign            | chr8  | 145154910 |
| SIGLEC12 | rs61743142  | 0.012471 | V → M | G → A | possibly damaging | chr19 | 52000187  |
| SIGLEC6  | rs60467951  | 0.025997 | R → Q | G → A | possibly damaging | chr19 | 52034506  |
| SKA3     | rs17279819  | 0.042705 | D → E | C → A | benign            | chr13 | 21732175  |
| SLC25A2  | rs10075302  | 0.047014 | G → C | G → T | possibly damaging | chr5  | 140682958 |

|         |             |          |       |       |                   |       |           |
|---------|-------------|----------|-------|-------|-------------------|-------|-----------|
| SLC26A3 | rs34407351  | 0.029783 | C → W | T → G | possibly damaging | chr7  | 107427322 |
| SLC26A8 |             | Unknown  | C → R | T → C | probably damaging | chr6  | 35980088  |
| SLC29A3 | rs34040486  | 0.5      | V → I | G → A | benign            | chr10 | 73115942  |
| SLC36A2 | rs77010315  | 0.00727  | G → V | G → T | probably damaging | chr5  | 150723155 |
| SLC6A17 | rs35600013  | 0.5      | A → T | G → A | benign            | chr1  | 110709720 |
| SLC9A2  |             | Unknown  | S → P | T → C | benign            | chr2  | 103317683 |
| SLC9A9  | rs2289491   | 0.021602 | I → V | A → G | benign            | chr3  | 142985717 |
| SLCO1C1 | rs36010656  | 0.037422 | P → T | C → A | benign            | chr12 | 20864342  |
| SMC2    |             | Unknown  | D → H | G → C | possibly damaging | chr9  | 106887330 |
| SON     | rs34373121  | Unknown  | R → S | A → C | unknown           | chr21 | 34948697  |
| SORCS2  | rs35935435  | 0.005296 | D → E | C → A | benign            | chr4  | 7666180   |
| SOX17   | rs189384157 | Unknown  | A → D | C → A | possibly damaging | chr8  | 55370796  |
| SP100   | rs57377576  | Unknown  | M → V | A → G | benign            | chr2  | 231333763 |
| SPDYE5  | rs794362    | 0.000913 | R → H | G → A | benign            | chr7  | 75131251  |
| SPIB    | rs113934432 | Unknown  | A → P | G → C | benign            | chr19 | 50926265  |
| SPRN    | rs2492666   | 0.00228  | T → M | C → T | possibly damaging | chr10 | 135237166 |
| SPZ1    | rs2047589   | 0.041933 | M → I | G → A | benign            | chr5  | 79616544  |
| SRRM4   | rs140426282 | Unknown  | R → P | G → C | possibly damaging | chr12 | 119594512 |
| STAB2   | rs149382223 | 0.000659 | Y → H | T → C | probably damaging | chr12 | 104089554 |
| STARD8  | rs55927581  | 0.017631 | G → R | G → A | benign            | chrX  | 67938269  |
| STK36   | rs16859180  | 0.046659 | R → W | C → T | probably damaging | chr2  | 219553468 |
| SVEP1   | rs142508835 | Unknown  | S → T | T → A | possibly damaging | chr9  | 113192279 |
| SYNE2   | rs75568433  | 0.009944 | P → T | C → A | probably damaging | chr14 | 64596823  |
| SYNM    | rs5030697   | 0.009593 | P → L | C → T | benign            | chr15 | 99671741  |
| SYT8    |             | Unknown  | S → F | C → T | possibly damaging | chr11 | 1856580   |
| TAF6L   | rs144825291 | 0.011884 | T → M | C → T | possibly damaging | chr11 | 62543398  |
| TAF7L   | rs147493489 | 0.005492 | E → K | G → A | benign            | chrX  | 100547853 |
| TARS2   |             | Unknown  | R → C | C → T | probably damaging | chr1  | 150479448 |
| TAS1R3  | rs76755863  | 0.033124 | A → T | G → A | benign            | chr1  | 1266738   |

|         |             |          |       |       |                   |       |           |
|---------|-------------|----------|-------|-------|-------------------|-------|-----------|
| TAS2R43 | rs113197337 | Unknown  | L → V | C → G | benign            | chr12 | 11244687  |
| TBC1D1  | rs61731607  | 0.033657 | A → P | G → C | benign            | chr4  | 38023279  |
| TBC1D1  | rs61731610  | 0.041301 | G → S | G → A | benign            | chr4  | 38023294  |
| TBC1D5  | rs79960281  | 0.012166 | Y → C | A → G | probably damaging | chr3  | 17349498  |
| TBX15   | rs61730011  | 0.030214 | M → R | T → G | probably damaging | chr1  | 119427467 |
| TCEB3C  | rs74217850  | 0.5      | S → C | C → G | possibly damaging | chr18 | 44555312  |
| TCF19   | rs7750641   | 0.036202 | P → S | C → T | benign            | chr6  | 31129310  |
| TCF3    | rs35354874  | 0.008314 | L → P | T → C | probably damaging | chr19 | 1627365   |
| TCN2    | rs1131603   | 0.031902 | L → S | T → C | probably damaging | chr22 | 31018975  |
| TCP10L2 | rs142318145 | Unknown  | A → T | G → A | possibly damaging | chr6  | 167585654 |
| TEKT5   | rs138126929 | 0.005492 | V → I | G → A | benign            | chr16 | 10788550  |
| TESSP1  | rs61747737  | 0.029386 | F → C | T → G | probably damaging | chr16 | 2854507   |
| TESSP5  |             | Unknown  | N → S | A → G | benign            | chr3  | 46783919  |
| TG      | rs2069548   | 0.007662 | G → D | G → A | probably damaging | chr8  | 133899575 |
| THEM4   | rs3748805   | 0.005455 | L → R | T → G | benign            | chr1  | 151881885 |
| TIAM1   | rs146645440 | 0.000439 | A → T | G → A | benign            | chr21 | 32492757  |
| TJP2    | rs41277907  | 0.049168 | S → F | C → T | benign            | chr9  | 71865988  |
| TLR10   | rs11466649  | 0.048838 | A → S | G → T | benign            | chr4  | 38776725  |
| TMED9   | rs57960711  | 0.034666 | T → S | C → G | benign            | chr5  | 177019262 |
| TMEM146 | rs139627891 | Unknown  | I → V | A → G | benign            | chr19 | 5748257   |
| TMEM217 | rs150173395 | 0.002197 | M → T | T → C | benign            | chr6  | 37186394  |
| TMEM223 | rs118167825 | 0.010399 | H → R | A → G | probably damaging | chr11 | 62559351  |
| TMOD4   | rs143662204 | 0.005492 | M → V | A → G | benign            | chr1  | 151143016 |
| TMTC1   |             | Unknown  | A → V | C → T | probably damaging | chr12 | 29911688  |
| TMX4    | rs1135711   | 0.028128 | Y → C | A → G | benign            | chr20 | 7964476   |
| TNIK    | rs17857452  | 0.015436 | A → T | G → A | benign            | chr3  | 170802910 |
| TNK1    | rs1142390   | Unknown  | V → M | G → A | benign            | chr17 | 7292107   |
| TNP2    | rs71383203  | 0.007306 | Q → H | G → C | benign            | chr16 | 11363003  |
| TNXB    | rs1150752   | 0.030842 | T → A | A → G | benign            | chr6  | 32064726  |

|          |             |          |       |       |                   |       |           |
|----------|-------------|----------|-------|-------|-------------------|-------|-----------|
| TOR1AIP1 | rs17279712  | 0.043211 | Q → H | A → C | benign            | chr1  | 179877780 |
| TP53RK   | rs34983477  | 0.02987  | R → Q | G → A | possibly damaging | chr20 | 45315786  |
| TPSB2    | rs1141965   | Unknown  | G → V | G → T | probably damaging | chr16 | 1279732   |
| TPSB2    | rs2272968   | Unknown  | R → P | G → C | benign            | chr16 | 1279909   |
| TPSB2    |             | Unknown  | N → S | A → G | benign            | chr16 | 1279945   |
| TREML1   | rs138237630 | 0.002636 | D → E | T → A | benign            | chr6  | 41117594  |
| TRIM73   |             | Unknown  | W → R | T → A | benign            | chr7  | 75028434  |
| TRPC4    | rs73184536  | 0.040665 | I → V | A → G | benign            | chr13 | 38211105  |
| TSC1     |             | Unknown  | M → T | T → C | benign            | chr9  | 135786904 |
| TSHR     | rs2234919   | 0.038462 | P → T | C → A | benign            | chr14 | 81422178  |
| TSHZ1    | rs33930274  | 0.03125  | A → T | G → A | benign            | chr18 | 72998899  |
| TSPAN10  | rs34896443  | 0.03581  | R → H | G → A | benign            | chr17 | 79612541  |
| TTC28    | rs56085644  | 0.000457 | R → H | G → A | benign            | chr22 | 28378351  |
| TTC28    |             | Unknown  | T → A | A → G | benign            | chr22 | 29075678  |
| TTC3     | rs61999340  | 0.034687 | L → V | C → G | probably damaging | chr21 | 38494273  |
| TTC5     | rs61741728  | 0.00616  | Y → C | A → G | probably damaging | chr14 | 20763603  |
| TLL10    | rs114390380 | 0.01198  | G → R | G → A | benign            | chr1  | 1115548   |
| TULP2    | rs139577147 | 0.006157 | R → H | G → A | benign            | chr19 | 49392882  |
| TULP4    |             | Unknown  | S → G | A → G | benign            | chr6  | 158923156 |
| TUT1     | rs117162358 | 0.007927 | R → H | G → A | probably damaging | chr11 | 62344743  |
| TYMP     | rs112723255 | 0.030165 | A → T | G → A | benign            | chr22 | 50964255  |
| UGT2B4   | rs67904882  | Unknown  | D → E | T → A | benign            | chr4  | 70346565  |
| UNC45B   | rs11654824  | 0.048883 | I → N | T → A | possibly damaging | chr17 | 33513337  |
| UNC84A   |             | Unknown  | G → S | G → A | benign            | chr7  | 897562    |
| USP32    |             | Unknown  | N → S | A → G | benign            | chr17 | 58288396  |
| USP54    | rs61761603  | 0.00905  | G → A | G → C | possibly damaging | chr10 | 75258901  |
| VCX2     | rs5934423   | Unknown  | T → R | C → G | benign            | chrX  | 8138641   |
| VN1R4    | rs12977715  | Unknown  | D → N | A → G | benign            | chr19 | 53770261  |
| VPS13B   | rs142476821 | 0.002334 | A → T | G → A | probably damaging | chr8  | 100874030 |



|         |             |          |       |       |                   |       |           |
|---------|-------------|----------|-------|-------|-------------------|-------|-----------|
| VPS37A  | rs17502618  | 0.006298 | I → F | A → T | benign            | chr8  | 17132441  |
| VRK3    | rs35331034  | 0.000659 | R → C | C → T | probably damaging | chr19 | 50491738  |
| WASF3   | rs17084492  | 0.047899 | S → L | C → T | benign            | chr13 | 27257004  |
| WDR1    | rs41268387  | 0.004113 | H → R | A → G | benign            | chr4  | 10089539  |
| WDR86   | rs4141455   | 0.003643 | M → T | T → C | benign            | chr7  | 151078735 |
| WISP1   | rs143089011 | 0.000463 | A → T | G → A | benign            | chr8  | 134233060 |
| WSCD1   | rs61735454  | 0.013158 | P → L | C → T | benign            | chr17 | 5984358   |
| XRRA1   | rs61736355  | 0.033539 | A → V | C → T | probably damaging | chr11 | 74618265  |
| YEATS2  | rs74496163  | 0.040295 | A → T | G → A | benign            | chr3  | 183508714 |
| ZBP1    | rs41304401  | 0.004454 | G → S | G → A | possibly damaging | chr20 | 56188219  |
| ZC3H12A | rs17849897  | 0.016995 | G → D | G → A | benign            | chr1  | 37949052  |
| ZFHx4   | rs56261025  | 0.026014 | V → L | G → C | benign            | chr8  | 77616519  |
| ZMYM4   | rs77324819  | 0.001484 | I → V | A → G | benign            | chr1  | 35847342  |
| ZNF22   | rs3740093   | 0.042823 | S → G | A → G | benign            | chr10 | 45499009  |
| ZNF257  | rs140340371 | Unknown  | C → R | T → C | benign            | chr19 | 22256303  |
| ZNF286B | rs2654297   | Unknown  | V → A | T → C | benign            | chr17 | 18584142  |
| ZNF34   |             | Unknown  | S → P | T → C | benign            | chr8  | 145999712 |
| ZNF345  | rs149031424 | 0.00331  | T → I | C → T | benign            | chr19 | 37368133  |
| ZNF443  | rs74181783  | 0.5      | K → T | A → C | probably damaging | chr19 | 12541547  |
| ZNF468  | rs75548544  | Unknown  | E → G | A → G | possibly damaging | chr19 | 53344051  |
| ZNF469  | rs141255631 | Unknown  | A → E | C → A | benign            | chr16 | 88497651  |
| ZNF517  | rs2976653   | 0.005906 | V → A | T → C | benign            | chr8  | 146033347 |
| ZNF676  | rs115951008 | 0.01778  | Y → C | A → G | possibly damaging | chr19 | 22364031  |
| ZNF717  | rs71630106  | 0.5      | V → I | G → A | benign            | chr3  | 75786832  |
| ZNF77   | rs144419578 | 0.001762 | Q → E | C → G | probably damaging | chr19 | 2936664   |
| ZNF790  |             | Unknown  | R → T | G → C | benign            | chr19 | 37311004  |
| ZNF880  | rs148392772 | Unknown  | R → Q | G → A | benign            | chr19 | 52887603  |
| ZP1     | rs145067883 | 0.003298 | V → I | G → A | benign            | chr11 | 60636698  |
